1 **Quantitative risk assessment of human H5N1 infection from consumption of fluid cow's**  
2 **milk**

3

4 Katherine J. Koebel, DVM<sup>1#</sup>, Ece Bulut, MS, PhD<sup>1</sup>, Samuel D. Alcaine, MS, PhD<sup>2</sup>, Aljoša  
5 Trmčić, PhD<sup>2</sup>, Mohammed Nooruzzaman, DVM, MS, PhD<sup>1</sup>, Lina M. Covaleda, PhD<sup>1</sup>, Diego G.  
6 Diel, DVM, MS, PhD<sup>1</sup>, & Renata Ivanek, DVM, MSc, PhD<sup>1</sup>

7

8 <sup>1</sup>Department of Population Medicine & Diagnostic Sciences, College of Veterinary Medicine,  
9 Cornell University, Ithaca, NY

10 <sup>2</sup>Department of Food Science, College of Agriculture & Life Sciences, Cornell University,  
11 Ithaca, NY

12

13 <sup>#</sup>Correspondence to: [kjk239@cornell.edu](mailto:kjk239@cornell.edu) | S1-020 Schurman Hall, 602 Tower Rd, Ithaca NY  
14 14850 | ORCID: 0000-0003-4910-2131

15 Word counts: Abstract: 146 | Main text (Introduction, Methods, Results, Discussion): 3,401

16 Running head: H5N1 fluid milk QRA

17 Keywords: H5N1, dairy cattle, quantitative risk assessment, dairy foods, raw milk

18

19 Summary: In this epidemiologic study, the public health risk of human H5N1 infection from  
20 drinking raw and pasteurized milk is investigated by use of quantitative risk assessment models.

21

22 Biosketch: Katherine J. Koebel earned her Bachelor's in Animal Science from Michigan State  
23 University and her Doctor of Veterinary Medicine from Cornell University. Her research draws  
24 from skills and experience in quantitative analysis, epidemiologic modeling, and dairy science.  
25 She is currently a PhD student in Epidemiology at Cornell University, researching One Health in  
26 the context of dairy cattle population medicine.

27 **Abstract**

28 The emergence of H5N1 clade 2.3.4.4b in dairy cattle raised concerns over the safety of fluid  
29 milk. We developed two stochastic quantitative risk assessment models to represent the United  
30 States raw and pasteurized fluid milk supply chains and employed these models in baseline,  
31 sensitivity, and scenario analysis. Median (5<sup>th</sup>, 95<sup>th</sup> percentiles) probabilities of infection per 240-  
32 mL pasteurized and farmstore-purchased raw milk serving were 5.68E-15 (1.766E-16, 2.98E-13)  
33 and 1.13E-03 (5.16E-06, 3.82E-02), respectively. This metric was highly sensitive to the viral  
34 titers in infected cows' milk. Pasteurization is highly effective at reducing this risk. Bulk tank  
35 milk PCR testing is more effective at reducing the probability of infection per raw milk serving  
36 than improving the identification and diversion of infected cows' milk at harvest. These findings  
37 emphasize the importance of pasteurization and dairy cow disease surveillance in reducing the  
38 risk of H5N1 infection associated with fluid milk consumption.

## 39 **Introduction**

40 Avian influenza (AI) threatens both avian and mammalian species. AI is an illness caused  
41 by multiple strains of the influenza A virus (IAV).(1,2) Of particular interest are the viruses of  
42 the H5N1 clade 2.3.4.4b. This clade emerged in 2020 and was subsequently detected in North  
43 America in late 2021.(3,4) Epidemiologic data highlight the predominance of this clade in  
44 reports of influenza A(H5) samples from both humans and animals.(5,6).

45 In March 2024, a spillover event resulted in the infection of dairy cattle in Texas with  
46 H5N1 clade 2.3.4.4b.(7,8) The initial infections have since spread to more than 800 herds  
47 nationwide as of 19 December 2024.(9) Infected cows present predominantly with clinical  
48 mastitis, usually in mid- to late-lactation, with additional signs such as anorexia, rumen  
49 hypomotility, and nasal discharge. Milk from these animals contains extremely high  
50 concentrations of virus (4.0-8.8 log<sub>10</sub>TCID<sub>50</sub>/mL (note: hereafter “logTCID<sub>50</sub>”)) and is infectious  
51 in a murine oral inoculation model.(7,10,11)

52 As of 19 December 2024, 37 human H5N1 cases with cattle exposure have been  
53 confirmed.(12,13) These cases were attributed to workplace exposure and no mortalities nor  
54 documented cases of foodborne transmission have been reported. Human cases are generally  
55 mild, including conjunctivitis and upper respiratory symptoms, and no human-to-human  
56 transmission has been proven.(14) Exposure in 2 cases is unknown (13). Additionally, on 24  
57 November 2024, a voluntary recall was issued after a lot of retail raw milk from a California  
58 dairy herd tested positive for H5N1.(15) No resultant illnesses have been reported, but the  
59 California Department of Public Health acknowledges the potential risk of human infection from  
60 contact with or ingestion of the product.

61 Many questions remain about the risk of human infection with H5N1 from fluid dairy  
62 milk. Recent studies demonstrate high efficacy of heat inactivation of the virus in milk (10,16);  
63 for example, high-temperature short-time (HTST) pasteurization is posited to yield a minimum  
64 12-log reduction in viral loads.(17) Despite the importance of pasteurization in reducing the risk  
65 of foodborne illness, consumption of raw milk remains popular in the U.S.; 4.4% of U.S. adults  
66 consume raw milk at least once per year.(18-20)

67 Timely research into the human infection risk associated with fluid milk consumption is  
68 essential to inform actions aimed at reducing said risk. The objectives of this study were to (i)  
69 estimate the public health risk of human H5N1 infection from consumption of raw or pasteurized  
70 fluid milk via quantitative risk assessment (QRA), (ii) assess intervention strategies, and (iii)  
71 identify key knowledge gaps.

72

## 73 **Methods**

74 Due to differences in the pasteurized and raw milk supply chains, two separate QRA  
75 models were developed in @RISK v.8.6.1 (Lumivero, Denver, CO), an add-on to Microsoft  
76 Excel 365 v.2406 (Microsoft Corp., Redmond, WA). Additionally, two raw milk purchasing  
77 pathways (farmstore and retail) were differentiated. Both models consisted of three main, and  
78 several additional, components (**Figure 1**); parameters are defined in **Table 1**.

79 We assume uniform spatial dispersion of the virus in fluid milk; ignorance of cumulative  
80 risk from consumption of multiple servings over time; a fixed number of herds shipping to a  
81 given processing plant; and unspecified fluid milk fat percentage (i.e. skim, 2%, 1%, or whole).

82 The implications thereof are elaborated upon in *Discussion*.

83

84 *Pasteurized Milk Model*

85 This model represents a given fluid milk processing plant receiving, processing,  
86 packaging, and distributing milk from a fixed number of herds. Fluid milk is followed from the  
87 plant through retail until its consumption by a consumer. The plant receives milk from 100 herds  
88 ( $n$ ), where the number of affected herds ( $k$ ) shipping to that plant is calculated with **Eqs. S1-3**.

89 The herds are of average size  $H_Z$ , with a healthy cow producing  $Y_H$  gal/d.(21,22) Infected  
90 cows comprise  $p_{herd}$  proportion of the herd and give  $Y_I$  relative yield with milk titers  $V_M$ .(7,23) A  
91 proportion  $D$  of these animals is identified and their milk is discarded at the time of harvest (i.e.  
92 does not enter the bulk tank). Diversion of this milk means identification of the animal as unfit to  
93 contribute to the milk supply, including but not limited to recognition of clinical illness or a  
94 laboratory-confirmed H5N1 infection.

95 Milk is pooled at the plant and held at 4°C for 24 hours, during which the viral titers  
96 experience log decay  $V_D$  of 0.1 logTCID<sub>50</sub>/d.(16) Temperature-dependent log decay is calculated  
97 with **Eq. S4**. This method was applied to all storage/transportation stages in both models.

98 The milk is HTST pasteurized, which is estimated to yield >12-log reduction of  
99 H5N1.(17) Pasteurization log reduction ( $L$ ) is therefore set at a baseline of 12 with additional  
100 evaluation during scenario analysis. Milk is packaged into gallon (3,785 mL) containers and the  
101 partitioning of virions modeled according to Nauta.(24) Gallons proceed through the cold chain:  
102 storage at the plant ( $U_{P-Z}$ ,  $T_{P-Z}$ ), transport to retail ( $U_{TR-Z}$ ,  $T_{TR-Z}$ ), storage at retail ( $U_{SR-Z}$ ,  $T_{SR-Z}$ ),  
103 transport to the consumer residence ( $U_{TC-Z}$ ,  $T_{TC-Z}$ ), and storage at the residence ( $U_{SC-Z}$ , and  $T_{SC-}$   
104  $z$ ). (25) Food waste of gallons ( $P_{Disc-Gal-Z}$ ) and servings ( $P_{Disc-Serv-Z}$ ) is accounted for.(26) The  
105 model culminates in the consumption of an 8-ounce (240 mL) serving. An exponential dose-  
106 response curve with parameter  $r$  is employed. Parameter  $r$  was calibrated using a mustelid model

107 of ingestion of H5N1-contaminated meat (**Eq. S5**).(27) To predict the number of H5N1 cases  
108 nationally from drinking pasteurized fluid dairy milk, per annum U.S. consumption statistics  
109 were obtained from an FDA QRA.(28)

110 Validation of the pasteurized milk model (its exposure assessment) was performed using  
111 nationwide dairy food surveillance data which reported the  $\log\text{EID}_{50}/\text{mL}$  (50% egg infectious  
112 doses; considered synonymous with  $\log\text{TCID}_{50}$  for our purposes) in pasteurized fluid milk at  
113 retail calculated via quantitative real-time RT-PCR (qrRT-PCR).(29) We reproduced this data by  
114 setting  $K=26$  (see **Eqs. 2-3**), running the model with  $L=0$ , and recording the concentration of  
115 virus ( $\log\text{TCID}_{50}/\text{mL}$ ) in fluid milk at retail. The output ( $\log\text{TCID}_{50}/\text{mL}$ ) can be interpreted as  
116 the equivalent amount of viral genetic material remaining in the product post-pasteurization,  
117 approximating the approach in Spackman *et al* (compared to their results, we combined all fluid  
118 milk types as our model does not differentiate between product fat percentages). We compared  
119 our predicted  $\log\text{TCID}_{50}/\text{mL}$  with Spackman *et al*'s  $\log\text{EID}_{50}/\text{mL}$  graphically.

120

### 121 *Raw Milk Model*

122 This model represents a herd of size  $H_W$  selling raw milk through either farmstore or  
123 retail pathways. No pooling of milk from multiple herds nor pasteurization occurs. Parameters  
124  $p_{nat'l}$ ,  $p_{herd}$ ,  $Y_H$ ,  $Y_L$ ,  $V_M$ ,  $V_D$ ,  $D$ , and  $r$  are shared with the pasteurized milk model. In the farmstore  
125 pathway, gallon packages are sold directly to consumers after storage at the farmstore ( $U_F$ ,  $T_F$ ).  
126 In the retail pathway, on-farm storage lag ( $U_{P-W}$ ,  $T_{P-W}$ ), retail transport ( $U_{TR-W}$ ,  $T_{TR-W}$ ), and retail  
127 storage ( $U_{SR}$ ,  $T_{TR}$ ) are modeled.(30) In both models packages are transported to ( $U_{TC-W}$ ,  $T_{TC-W}$ ,  
128  $T_H$ ) and stored at ( $U_{SC-W}$ , and  $T_{SC-W}$ ) the consumer residence. The milk temperature during  
129 transport to the residence ( $T_{TC-W}$ ) is calculated with **Eq. S6**. Accounting for raw milk

130 perishability, the probability of spoilage and discard of the product is adapted from Crotta *et al*  
131 **(Eq. S7)**.(31)

132

133 *Analysis*

134 The primary risk output reported is the “probability of infection per serving” (hereafter  
135 “p(infection)”) for both models. Sensitivity analysis was conducted with partial rank correlation  
136 coefficients ( $\rho$ ) achieving statistical significance after Bonferroni correction at  $\alpha=0.05/(\text{number}$   
137 of stochastic parameters in model). Parameters with  $|\rho| \leq 0.1$  were considered negligible (and of  
138 low practical significance) and were omitted from further discussion.(32) Coefficient strength  
139 ranges were adapted from this paper as well, where  $0.1 < |\rho| < 0.40$  is weak,  $0.40 \leq |\rho| < 0.70$  is  
140 moderate, and  $0.70 \leq |\rho|$  is strong.

141 Scenario analyses investigated the effects of four parameters on p(infection) (**Table 1**): in  
142 the pasteurized milk model, (i) pasteurization ( $L$ ); in both models, (ii) dose-response parameter  $r$ ;  
143 and in the raw milk model, (iii) improved infected animal diversion ( $D$ ) and (iv) bulk tank PCR  
144 testing. In the pasteurized milk model,  $L$  was tested at levels 6-, 8-, 10-, 12- (baseline), and 14-  
145 log reduction. Similarly, in both models, the dose-response parameter  $r$  was tested at levels 1E-6,  
146 1E-8 (baseline), and 1E-10. Lastly, full factorial analysis was performed to examine two  
147 interventions aimed at reducing risk from consumption of raw milk. Parameters sensitivity ( $Se$ ),  
148 specificity ( $Sp$ ), and limit of detection ( $LoD$ ) are employed regarding PCR testing;(33,34) all  
149 positive tanks (true or false) are discarded. All negatives (true or false) proceed to distribution.

150 Simulations are comprised of 50,000 iterations generated with Latin hypercube sampling  
151 and Mersenne twister pseudorandom number generation. Convergence testing with 5% tolerance



152 and 95% confidence confirmed the sufficiency of the iteration number. Figures were produced in  
153 R v4.3.2 (R Foundation for Statistical Computing, Vienna, Austria).

154  
155 **Results**

156 QRA models were developed for the raw and pasteurized milk supply chains (**Figure 1**).  
157 Projections for the concentration of viral material in retail gallon packages conform well to the  
158 results of previously conducted surveillance testing, (29) supporting the validity of the QRA  
159 models' exposure assessment (**Figure 2**). Baseline p(infection) per serving indicated similarity  
160 between the two raw milk purchasing pathways (**Figure 3** and **Table S1**). Paired with the  
161 increased access to farmstore-sold over retail raw milk in terms of state legality,(35) further  
162 description of results is limited to the farmstore pathway, except in sensitivity analysis.

163  
164 *Baseline scenario*

165 Risk metrics in the pasteurized milk model were very low (**Figure 3**). 5th and 95th  
166 percentiles for p(infection) were 1.77E-16 and 2.98E-13, respectively, with a median value of  
167 5.68E-15 (**Table S1**). The quantity of virus per contaminated serving was similarly low, ranging  
168 from 0 to 0.30 logTCID<sub>50</sub> with a mean value of 0.019 logTCID<sub>50</sub>. A value of 0 logTCID<sub>50</sub>  
169 corresponds to a single TCID<sub>50</sub> in a serving and 0.30 logTCID<sub>50</sub> corresponds to 2 TCID<sub>50</sub> in a  
170 serving. Prevalence of serving contamination took percentiles of 2.43E-08 (5th) and 4.03E-05  
171 (95th) with a median of 7.67E-07. Note that this refers to the presence of live infectious virus  
172 and not viral material alone. Out of 50,000 iterations, n=290 (0.58%) projected milk-borne  
173 human H5N1 infections with 1 (n=281), 2 (n=8), or 3 (n=1) infections projected in these  
174 iterations. An iteration represents a full calendar year of average U.S. fluid milk consumption  
175 under the simulated conditions.

176 In the raw milk model, risk metrics were considerably higher (12-log difference in  
177 medians) than in the pasteurized milk model (**Figure 3** and **Table S1**). Median p(infection) was  
178 1.13E-03, with percentiles of 5.16E-06 (5th) to 3.82E-02 (95th). Percentiles for the quantity of  
179 virus per contaminated serving ranged from 5.22 (5th) to 8.49 (95th) with a median value of 6.88  
180 logTCID<sub>50</sub>. Median prevalence of serving contamination was 3.13E-02 (5th percentile: 3.21E-03;  
181 95th percentile: 1.07E-01).

182

### 183 *Sensitivity analysis*

184 Tornado plots are given in **Figures 4a-c**. Parameter notation is available in **Table 1**. In  
185 both models,  $V_M$  was very strongly correlated with the p(infection) (pasteurized:  $\rho=0.94$ ; raw,  
186 farmstore:  $\rho=0.88$ , raw, retail:  $\rho=0.83$ ). This metric was also sensitive to  $p_{nat'l}$  in both models  
187 (pasteurized:  $\rho=0.80$ ; raw, farmstore:  $\rho=0.72$ ; raw, retail:  $\rho=0.63$ ).

188 In the pasteurized milk model, parameter  $p_{herd}$  demonstrated moderate positive  
189 correlation ( $\rho=0.52$ ).  $Y_I$  was weakly correlated ( $\rho=0.15$ ).  $H_Z$  ( $\rho=-0.10$ ) yielded negligible  
190 correlation. In the raw milk model, weak positive correlation was observed in  $p_{herd}$  (farmstore:  
191  $\rho=0.29$ ; retail:  $\rho=0.24$ ). For the farmstore purchase pathway, moderate negative correlations  
192 were observed in  $U_F$  ( $\rho=-0.62$ ),  $T_F$  ( $\rho=-0.54$ ),  $U_{SC}$  ( $\rho=-0.48$ ), and  $T_{SC}$  ( $\rho=-0.43$ ). Similarly, in the  
193 retail purchase pathway,  $U_{SR}$  ( $\rho=-0.54$ ) and  $T_{SR}$  ( $\rho=-0.42$ ) display moderate negative correlation.  
194  $Y_I$  (farmstore:  $\rho=0.09$ ; retail:  $\rho=0.08$ ) was negligible in both purchasing pathways. Compared  
195 against their counterparts in the pasteurized milk model, the strengths and directions of  
196 statistically significant parameters were comparable with the exceptions of  $H_W$  (farmstore:  $\rho=-$   
197 0.12; retail:  $\rho=-0.10$ ), which was considered weak in the farmstore pathway and negligible in

198 retail, and parameters  $T_H$  (farmstore:  $\rho=-0.01$ ) and  $U_{TC}$  (farmstore:  $\rho=-0.01$ ), which failed to  
199 achieve significance in the retail pathway.

200

### 201 *Scenario analysis*

202 The median p(infection) was equal to 3.71E-10 and 3.49E-16 in the 6- and 14-log  
203 pasteurization scenarios, respectively (**Figure 5** and **Table S2**). Increases in the pasteurization  
204 efficacy parameter  $L$  produced a progressively lower median p(infection) at each level tested.

205 A 100-fold increase in the dose-response parameter  $r$  (i.e. from a baseline of 1E-8 to 1E-  
206 6), meaning a decrease in the quantity of virus necessary to result in infection, proportionately  
207 increases (by 1-2 logs) p(infection), and vice versa (**Figure 6** and **Table S3**). For example, for  
208 pasteurized milk, median p(infection) increases from 5.68E-15 to 5.68E-13 when  $r$  increases by  
209 2-log. This effect was consistent in both raw milk purchasing pathways (**Figure S1**).

210 In the raw milk supply chain, bulk tank PCR testing was more effective than improved  
211 animal diversion in reducing p(infection); for all three levels of diversion, the addition of bulk  
212 tank PCR testing reduced median p(infection) by 1-2 log (**Figures 7** and **S2**). In the farmstore  
213 purchase pathway (**Table S4**), without bulk tank PCR, increasing infected cow diversion over a  
214 25% baseline to 50% reduced the median p(infection) from 1.13E-03 to 7.90E-04; with the  
215 addition of bulk tank PCR, this value at 25% diversion was 1.81E-05, then 1.26E-05 at 50%  
216 diversion. Results for the retail purchase pathway were similar (**Table S5**).

217

## 218 **Discussion**

219 Our model predicts the risk of human H5N1 infection from consumption of pasteurized  
220 fluid milk is extremely low (**Figure 3** and **Table S1**), supporting claims about the safety of the  
221 domestic pasteurized fluid milk supply chain. According to research surrounding H5N1 and

222 HTST pasteurization, 12-log reduction is highly efficacious at reducing the public health  
223 risk.(17) Even if a small quantity of infectious virions survive pasteurization, partitioning of  
224 these units during packaging further reduces infection risk. In iterations producing a non-zero  
225 amount of live virus in a serving, the dose-response parameter  $r$  is a significant driver of  
226 infection risk, as even 1-2 TCID<sub>50</sub> can cause infection under the exponential dose-response  
227 model, albeit with a very low probability. With the importance of  $r$  demonstrated in scenario  
228 analysis (**Figure 6** and **Table S3**), further research into H5N1 ingestion dose-response is needed.  
229 As seen in sensitivity analysis (**Figure 4**), the predicted low infection risk is also due in small  
230 part to the dilution effect of pooling from multiple herds and the reduced milk yield of infected  
231 cows that are not diverted from the supply chain. Also in sensitivity analysis, the decreased  
232 H5N1 infection risk in raw milk associated with increased storage temperatures/times is a  
233 function of viral decay; excessive or inappropriate storage of dairy products is not advisable due  
234 to the risk of illness from spoilage pathogens.

235         The human public health burden from pasteurized milk is predicted to be low, in that  
236 <1% of iterations predicted a maximum of 3 cases attributable to its consumption. Note that this  
237 output is calculated with per annum consumption data and thus represents the projected *annual*  
238 number of infections extrapolating from epidemiologic data collected between March and  
239 November of this EID situation; the implications behind this must be considered. Expansion of  
240 the virus into California has caused rapid increases in herd infections; as H5N1 continues to  
241 spread, by a means still not well understood, it is unknown where in the epidemic curve the U.S.  
242 national herd is currently. The model addresses this with stochasticity in the monthly national  
243 herd-level prevalence parameter  $p_{nat}$ , but projections of risk may be over- or underestimated.

244 While a >12-log reduction is posited (17), demonstration of pasteurization efficacy is  
245 fundamentally limited by the viral concentration of the initial sample.(16) In order to definitively  
246 demonstrate efficacy, assays with supraphysiological concentrations of the virus must be  
247 conducted. Pasteurization remains the most effective method for reducing risk amidst this H5N1  
248 outbreak, and per scenario analysis (**Table S2**), should its efficacy be overestimated or a  
249 pasteurization failure go undetected, the risk to public health would be substantial.

250 Unknowns surrounding the clinical manifestations of human H5N1 infection by ingestion  
251 must be considered. The two cases of Michigan dairy workers cite potential exposure from  
252 splashing milk and direct contact with oronasal secretions during animal care procedures.(36) It  
253 is unknown what symptoms an infection from ingestion would produce in a human. In laboratory  
254 animal studies, clinical signs after H5N1 ingestion ranged from none to weight loss and lethargy,  
255 up to and including mortality.(27,10,11,37) It is thought that viral contact with the oropharynx  
256 during deglutition is the route of entry sufficient to establish infection in these models. Perhaps  
257 presentation with conjunctivitis in humans is a function of the route of exposure, including the  
258 splash of contaminated material into the mucous membranes of the face. Other routes of  
259 exposure may produce a different array of symptoms. Therefore, the absence of a documented  
260 case attributable to milk consumption may be a result of asymptomaticity or non-reporting.

261 Exposure in two H5N1 cases remains unattributed.(13)

262 Wastewater surveillance has proven applications in the context of this outbreak.  
263 Detection of H5N1 in Texas wastewater coincided with the emergence of the disease syndrome  
264 in dairy cattle and predates the official announcement of the causative agent.(38) While genetic  
265 analysis of wastewater samples indicates primarily bovine contribution (likely milk effluent from  
266 farms or processing plants), viral shedding in human sewage cannot be ruled out.(39) As such,

267 wastewater surveillance in areas without cattle could be used to identify human cases even if said  
268 cases are asymptomatic.

269         Ingestion of raw milk carries inherent risk of foodborne illness, primarily bacterial.(18-  
270 20) Our model demonstrates that, without pasteurization, the  $p(\text{infection})$  is dramatically higher.  
271 Given the popularity of raw milk amongst U.S. consumers, in light of this EID there is an urgent  
272 need for new technological, educational, and policy solutions to protect public health. Here we  
273 have demonstrated the efficacy of two interventions. PCR testing of raw milk herd bulk tanks is  
274 highly efficacious in reducing  $p(\text{infection})$ , more so than improving the ability to identify and  
275 divert milk from infected cows. However, despite its comparatively weaker effect, diverting  
276 infected cows is still important, as this relates to sensitivity in both models to viral titers in  
277 infected cow milk ( $V_M$ ). The U.S.D.A. is currently implementing a bulk tank milk testing  
278 surveillance plan at the state and locoregional levels.(40)

279         The assumptions and limitations of any QRA must be acknowledged for appropriate  
280 interpretation of its results. We assume uniform spatial dispersion of virus in milk; if this is  
281 incorrect and clustering is present, the resultant distribution for the quantity of virus per serving,  
282 and therefore the predicted  $p(\text{infection})$ , is incorrect as a smaller proportion of packages will  
283 contain more virions paired with a lower prevalence of serving contamination. This may also be  
284 true for different milkfat levels, if virions distribute differently in fat globules versus the liquid  
285 fraction. As Spackman *et al* report slight differences in the concentration of viral material  
286 amongst different milkfat levels,(29) continued surveillance is required to determine if this is a  
287 function of processing or sample size. Our model does not differentiate between milkfat levels; if  
288 sufficient data become available to allow for inclusion of milkfat as a parameter, projections of  
289 risk may shift in either direction. Next, a fixed number of herds contribute to the modeled plant.

290 Due to the dilution effect demonstrated previously, deviation from a fixed  $n$  in real life may  
291 increase or decrease risk. Lastly, note that we report risk  $p(\text{infection})$  as the probability of  
292 infection per single, 8-ounce (240 mL) serving. We assume that  $p(\text{infection})$  of a given serving is  
293 independent of the “next” consumed serving. In reality, there may be a cumulative risk from  
294 consumption of multiple subinfectious doses over time, therefore underestimating true risk.

295 Additional information is needed to make a QRA accounting for all dairy products. As  
296 research characterizing H5N1 in other dairy foods becomes available, the framework of our  
297 model may be adapted. As of 6 December 2024, a new Federal Order has been mandated  
298 requiring processor-level raw milk H5N1 surveillance. Implementation of this initiative is  
299 supported by the projections of our models, and results from this heightened surveillance will  
300 prove useful in future model developments.(41) For example, academics and industry  
301 stakeholders have expressed interest in studying H5N1 in raw milk cheese. The expansion of our  
302 models to fill this knowledge gap is being pursued by the authors.

303 In conclusion, based on the results of this QRA and the most up-to-date scientific  
304 literature, the risk of human H5N1 infection from consumption of pasteurized fluid milk is  
305 extremely low. Consumption of raw milk has historically been discouraged due to the risk of  
306 foodborne illness; in the context of this EID, the emergence of a novel potential milkborne  
307 pathogen emphasizes both the risk of this practice and the need for solutions to effectively  
308 protect public health. This risk may be reduced with implementation of risk mitigation  
309 interventions, including thermal treatment and bulk tank PCR testing. As new information  
310 becomes available, the models will be refined and new applications considered.

311

312 **Acknowledgements**

313 Research reported in this publication was supported by the Office of the Director, National  
314 Institutes of Health of the National Institutions of Health (NIH) under Award Number  
315 T32ODO011000. The content is solely the responsibility of the authors and does not necessarily  
316 represent the official views of the National Center for Research Resources or the NIH.  
317 Additionally, this research was partially supported by grants to RI from the National Institute of  
318 Food and Agriculture, USDA, Hatch under Accession Number 7000433, as well as Multistate  
319 Research Funds Accession Number 1016738.

320

## 321 **References**

- 322 1. Alexander DJ. An overview of the epidemiology of avian influenza. *Vaccine*. 2007 Jul  
323 26;25(30):5637-44. doi: 10.1016/j.vaccine.2006.10.051  
324
- 325 2. Swayne DE. Avian Influenza. 2023 Jun. In: Merck Veterinary Manual. Available from:  
326 <https://www.merckvetmanual.com/poultry/avian-influenza/avian-influenza>. Accessed  
327 2024 May 17.  
328
- 329 3. Bevins SN, Shriner SA, Cumbee JC, Dilione KE, Douglass KE, Ellis JW, *et al*.  
330 Intercontinental Movement of Highly Pathogenic Avian Influenza A(H5N1) Clade  
331 2.3.4.4 Virus to the United States, 2021. *Emerg Infect Dis*. 2022;28(5):1006-1011. doi:  
332 10.3201/eid2805.220318  
333
- 334 4. Kandeil A, Patton C, Jones JC, Jeevan T, Harrington WN, Trifkovic S, *et al*. Rapid  
335 evolution of A(H5N1) influenza viruses after intercontinental spread to North America.  
336 *Nat Commun*. 2023 May 29;14(3082). doi: 10.1038/s41467-023-38415-7  
337
- 338 5. World Organisation for Animal Health World Animal Health Information System. United  
339 States of America - Influenza A viruses of high pathogenicity (Inf. with) (non-poultry  
340 including wild birds) (2017-). Available from: [https://wahis.woah.org/#/in-](https://wahis.woah.org/#/in-event/4451/dashboard)  
341 [event/4451/dashboard](https://wahis.woah.org/#/in-event/4451/dashboard)  
342
- 343 6. World Health Organization. Genetic and antigenic characteristics of zoonotic influenza A  
344 viruses and development of candidate vaccine viruses for pandemic preparedness. 2023  
345 Feb 24.  
346



- 347 7. Caserta LC, Frye EA, Butt SL, Laverack M, Nooruzzaman M, Covaleda LM *et al.*  
348 Spillover of highly pathogenic avian influenza H5N1 virus to dairy cattle. *Nature*.  
349 2024;634:669-676. doi: 10.1038/s41586-024-07849-4  
350
- 351 8. Burrough ER, Magstadt DR, Petersen B, Timmermans SJ, Gauger PC, Zhang J, *et al.*  
352 Highly Pathogenic Avian Influenza A(H5N1) Clade 2.3.4.4b Virus Infection in Domestic  
353 Dairy Cattle and Cats, United States, 2024. *Emerg Infect Dis*. 2024;30(7):1335-1343. doi:  
354 10.3201/eid3007.240508  
355
- 356 9. U.S. Department of Agriculture Animal and Plant Health Inspection Service. HPAI  
357 confirmed cases in livestock. Available from: [https://www.aphis.usda.gov/livestock-](https://www.aphis.usda.gov/livestock-poultry-disease/avian/avian-influenza/hpai-detections/hpai-confirmed-cases-livestock)  
358 [poultry-disease/avian/avian-influenza/hpai-detections/hpai-confirmed-cases-livestock](https://www.aphis.usda.gov/livestock-poultry-disease/avian/avian-influenza/hpai-detections/hpai-confirmed-cases-livestock)  
359
- 360 10. Guan L, Eisfeld AJ, Pattinson D, Gu C, Biswas A, Maemura T, *et al.* Cow's Milk  
361 Containing Avian Influenza A(H5N1) Virus - Heat Inactivation and Infectivity in Mice.  
362 *N Engl J Med*. 2024 Jul 4;391(1):87-90. doi: 10.1056/NEJMc2405495  
363
- 364 11. Eisfeld, AJ, Biswas A, Guan L, Gu C, Maemura T, Trifkovic S, *et al.* Pathogenicity and  
365 transmissibility of bovine H5N1 influenza virus. *Nature*. 2024 July 8;633:426-432. doi:  
366 10.1038/s41586-024-07766-6  
367
- 368 12. Uyeki TM, Milton S, Hamid CA, Webb CR, Presley SM, Shetty V *et al.* Highly  
369 pathogenic avian influenza A(H5N1) virus infection in a dairy farm worker. *N Engl J*  
370 *Med*. 2024 May 3;390:2028-2029. doi: 10.1056/nejmc2405371  
371
- 372 13. U.S. Department of Health and Human Services Centers for Disease Control and  
373 Prevention. H5 Bird Flu: Current Situation. 2024 Nov 13. Available from:  
374 <https://www.cdc.gov/bird-flu/situation-summary/index.html>  
375
- 376 14. Neumann G, Kawaoka Y. Highly pathogenic H5N1 avian influenza virus outbreak in  
377 cattle: the knowns and unknowns. *Nat Rev Microbiol*. 2024 Jul 25;22:525-526. doi:  
378 /10.1038/s41579-024-01087-1  
379
- 380 15. California Department of Public Health. California acts to protect public health: CDPH  
381 warns against drinking single lot of raw milk following bird flu detection; secures  
382 voluntary recall. 2024 Nov 24. Available from:  
383 <https://www.cdph.ca.gov/Programs/OPA/Pages/NR24-039.aspx>  
384
- 385 16. Nooruzzaman M, Covaleda LM, Martin, NH, Koebel K, Ivanek R, Alcaine SD, Diel DG.  
386 Thermal inactivation spectrum of influenza A H5N1 virus in raw milk. 2024 Sep 24.

- 387 [Preprint] Available from:  
388 <https://www.biorxiv.org/content/10.1101/2024.09.21.614205v1>  
389
- 390 17. Spackman E, Anderson N, Walker S, Suarez DL, Jones DR, McCoig *et al.* Inactivation of  
391 highly pathogenic avian influenza virus with high-temperature short time continuous flow  
392 pasteurization and virus detection in bulk milk tanks. *J Food Protect.* October  
393 2024;87(10). doi: 10.1016/j.jfp.2024.100349  
394
- 395 18. Lando AM, Bazaco MC, Parker CC, Ferguson M. Characteristics of U.S. consumers  
396 reporting past year intake of raw (unpasteurized) milk: Results from the 2016 Food  
397 Safety Survey and 2019 Food Safety and Nutrition Survey. *J Food Protect.* 2022 Mar  
398 25;85(7):1036-1043.  
399
- 400 19. U.S. Department of Health and Human Services Centers for Disease Control and  
401 Prevention. Raw Milk. 2024 Apr 29. Available from: [https://www.cdc.gov/food-](https://www.cdc.gov/food-safety/foods/raw-milk.html)  
402 [safety/foods/raw-milk.html](https://www.cdc.gov/food-safety/foods/raw-milk.html)  
403
- 404 20. United States Food and Drug Administration. Food Safety and Raw Milk. 2024 Mar 5.  
405 Available from: [https://www.fda.gov/food/buy-store-serve-safe-food/food-safety-and-](https://www.fda.gov/food/buy-store-serve-safe-food/food-safety-and-raw-milk)  
406 [raw-milk](https://www.fda.gov/food/buy-store-serve-safe-food/food-safety-and-raw-milk). Accessed 2024 May 16.  
407
- 408 21. U.S. Department of Agriculture National Agricultural Statistics Service. 2022 Census of  
409 Agriculture. Complete data available at: [www.nass.usda.gov/AgCensus](http://www.nass.usda.gov/AgCensus)  
410
- 411 22. U.S. Department of Agriculture National Agricultural Statistics Service. Quick Stats  
412 database query. Available at: [https://www.nass.usda.gov/Quick\\_Stats/](https://www.nass.usda.gov/Quick_Stats/)  
413
- 414 23. Durst, P. HPAI dairy herd infection report. Michigan State University Extension. 2024  
415 May 24. Available from: [https://www.canr.msu.edu/news/hpai-dairy-herd-infection-case-](https://www.canr.msu.edu/news/hpai-dairy-herd-infection-case-report)  
416 [report](https://www.canr.msu.edu/news/hpai-dairy-herd-infection-case-report)  
417
- 418 24. Nauta MJ. Microbiological risk assessment models for partitioning and mixing during  
419 food handling. *Int J Food Microbiol.* 2005 Apr 15;100:311-322. doi:  
420 10.1016/j.ijfoodmicro.2004.10.027  
421
- 422 25. Qian C, Murphy SI, Lott TT, Martin NH, Wiedmann M. Development and deployment of  
423 a supply-chain digital tool to predict fluid-milk spoilage due to psychrotolerant  
424 sporeformers. *J Dairy Sci.* 2023 Aug 23;106(12):8415-33. doi: 10.3168/jds.2023-23673  
425

- 426 26. Buzby JC, Wells HF, and Hyman J. The Estimated Amount, Value, and Calories of  
427 Postharvest Food Losses at the Retail and Consumer Levels in the United States, EIB-  
428 121, U.S. Department of Agriculture, Economic Research Service, February 2014.  
429
- 430 27. Lipatov AS, Kwon YK, Pantin-Jackwood MJ, Swayne DE. Pathogenesis of H5N1  
431 influenza virus infections in mice and ferret models differs according to respiratory tract  
432 or digestive system exposure. *J Infect Dis.* 2009 Mar 01;199(5):717-725. doi:  
433 10.1086/596740  
434
- 435 28. U.S. Department of Health and Human Services Food and Drug Administration, Center  
436 for Food Safety and Applied Nutrition. Quantitative assessment of relative risk to public  
437 health from foodborne *Listeria monocytogenes* among selected ready-to-eat foods.  
438 September 2003.  
439
- 440 29. Spackman E, Jones DR, McCoig AM, Colonius TJ, Goraichuk IV, Suarez DL.  
441 Characterization of highly pathogenic avian influenza virus in retail dairy products in the  
442 US. *J Virol.* 2024 Jul 23;98(7). doi: 10.1128/jvi.00881-24  
443
- 444 30. Latorre, AA, Pradhan AK, van Kessel JAS, Karns JS, Boor KJ, Rice DH *et al.*  
445 Quantitative risk assessment of listeriosis due to consumption of raw milk. *J. Food*  
446 *Protect.* 2011 Aug;74(8):1268-81. doi: 10.4315/0362-028X.JFP-10-554  
447
- 448 31. Crotta M, Paterlini F, Rizzi R, Guitian, J. Consumers' behavior in quantitative microbial  
449 risk assessment for pathogens in raw milk: Incorporation of the likelihood of  
450 consumption as a function of storage time and temperature. *J Dairy Sci.* 2015 Oct  
451 14;99(2):1029-38. doi: 10.3168/jds.2015-10175  
452
- 453 32. Schober P, Boer C, Schwarte LA. Correlation coefficients: Appropriate use and  
454 interpretation. *Anesth Analg.* 2018 May;126(5):1763-1768. doi:  
455 10.1213/ANE.0000000000002864  
456
- 457 33. Thermo Fisher Scientific. VetMAX-Gold SIV solutions. 2017. Available from:  
458 [https://assets.thermofisher.com/TFS-](https://assets.thermofisher.com/TFS-Assets/GSD/Flyers/animalhealth_flyer_vetmaxgold_siv_CO121090.pdf)  
459 [Assets/GSD/Flyers/animalhealth\\_flyer\\_vetmaxgold\\_siv\\_CO121090.pdf](https://assets.thermofisher.com/TFS-Assets/GSD/Flyers/animalhealth_flyer_vetmaxgold_siv_CO121090.pdf)  
460
- 461 34. Laconi A, Fortin A, Bedendo G, Shibata A, Sakoda Y, Awuni JA *et al.* Detection of  
462 avian influenza virus: a comparative study of the *in silico* and *in vitro* performances of  
463 current RT-qPCR assays. *Sci Rep.* 2020 May 21;10:8441. doi: 10.1038/s41598-020-  
464 64003-6  
465

- 466 35. Rhodes MT, Kuchler F, McClelland K, Hamrick KS. Consumer food safety practices:  
467 raw milk consumption and food thermometer use, EIB-205, U.S. Department of  
468 Agriculture, Economic Research Service, January 2019.  
469
- 470 36. Morse J, Coyle J, Mikesell L, Stoddard B, Eckel S, Weinberg M, *et al.* Influenza  
471 A(H5N1) virus infection in two dairy farm workers in Michigan. *New Engl J Med.* 2024  
472 Aug 7;391:963-4. doi: 10.1056/NEJMc2407264  
473
- 474 37. Gu C, Maemura T, Guan L, Einfeld AJ, Biswas A, Kiso M, *et al.* A human isolate of  
475 bovine H5N1 is transmissible and lethal in animal models. *Nature.* 2024 Oct 28. doi:  
476 10.1038/s41586-024-08254-7  
477
- 478 38. Tisza MJ, Hanson BM, Clark JR, Wang L, Payne K, Ross MC, *et al.* Virome sequencing  
479 identifies H5N1 influenza in wastewater from nine cities. 2024 May 10. [Preprint]  
480 Available from:  
481 <https://www.medrxiv.org/content/10.1101/2024.05.10.24307179v1.full.pdf>  
482
- 483 39. Honein MA, Olsen SJ, Jernigan DB, Daskalakis DC. Challenges and opportunities for  
484 wastewater monitoring of influenza viruses during the multistate outbreak of highly  
485 pathogenic avian influenza A(H5N1) virus in dairy cattle and poultry. 2024 Nov 6. *Am J*  
486 *Public Health.* doi: 10.2105/AJPH.2024.307860  
487
- 488 40. U.S. Department of Agriculture, Animal and Plant Health Inspection Service. USDA  
489 builds on actions to protect livestock and public health from H5N1 avian influenza. 2024  
490 Oct 30. Available from: [https://www.aphis.usda.gov/news/agency-announcements/usda-](https://www.aphis.usda.gov/news/agency-announcements/usda-builds-actions-protect-livestock-public-health-h5n1-avian-influenza)  
491 [builds-actions-protect-livestock-public-health-h5n1-avian-influenza](https://www.aphis.usda.gov/news/agency-announcements/usda-builds-actions-protect-livestock-public-health-h5n1-avian-influenza)  
492
- 493 41. U.S. Department of Agriculture. USDA announces new federal order, begins national  
494 milk testing strategy to address H5N1 in dairy herds. 2024 Dec 6. Available from:  
495 [https://www.usda.gov/article/usda-announces-new-federal-order-begins-national-milk-](https://www.usda.gov/article/usda-announces-new-federal-order-begins-national-milk-testing-strategy-address-h5n1-dairy-herds)  
496 [testing-strategy-address-h5n1-dairy-herds](https://www.usda.gov/article/usda-announces-new-federal-order-begins-national-milk-testing-strategy-address-h5n1-dairy-herds)

497 **Tables and Figures**

498

499 **Table 1: Parameters used in a quantitative risk assessment of human H5N1 infection from**  
 500 **consumption of pasteurized and raw fluid dairy milk.**

| Parameter                                                                      | Pasteurized Milk Model (Z)           |            | Raw Milk Model (W)                   |                    |
|--------------------------------------------------------------------------------|--------------------------------------|------------|--------------------------------------|--------------------|
|                                                                                | Value                                | Source     | Value                                | Source             |
| Number of herds per plant ( <i>n</i> )                                         | 100                                  | Assumption | NA                                   | NA                 |
| U.S. Herd-Level H5N1 Prevalence ( <i>p<sub>nat'l</sub></i> )                   | PERT(0.00080321, 0.00080321, 0.2363) | 9,21,22    | PERT(0.00080321, 0.00080321, 0.2363) | 9,21,22            |
| Number of affected herds in U.S. ( <i>K</i> )                                  | See Eqs. S2-3.                       | 9,21,22    | NA                                   | 9,21,22            |
| Number of herds in U.S. ( <i>N</i> )                                           | 23,153                               | 21         | 23,153                               | 21                 |
| Number of affected herds shipping to plant ( <i>k</i> )                        | See Eqs. S1-3.                       | 21         | NA                                   | NA                 |
| Average herd size (head) ( <i>H</i> )                                          | TRIANG(20, 350, 5000)                | 21         | TRIANG(2, 20, 50)                    | Expert elicitation |
| Within-Herd H5N1 Prevalence (% , x100) ( <i>p<sub>herd</sub></i> )             | UNIF(0.0342, 0.2349)                 | 7          | UNIF(0.0342, 0.2349)                 | 7                  |
| Healthy cow milk yield (gal/day) ( <i>Y<sub>H</sub></i> )                      | PERT(8, 9, 10)                       | 22         | PERT(8, 9, 10)                       | 22                 |
| Infected cow relative milk yield (% of healthy, x100) ( <i>Y<sub>I</sub></i> ) | PERT(0.5, 0.6, 1.0)                  | 23         | PERT(0.5, 0.6, 1.0)                  | 23                 |
| Viral titer in                                                                 | PERT(4.0, 6.5,                       | 7          | PERT(4.0, 6.5,                       | 7                  |

|                                                                                               |                                   |    |                                           |    |
|-----------------------------------------------------------------------------------------------|-----------------------------------|----|-------------------------------------------|----|
| infected cow milk (logTCID <sub>50</sub> /mL) ( $V_M$ )                                       | 8.8)                              |    | 8.8)                                      |    |
| Viral decay rate (log/day) ( $V_D$ )                                                          | At 4°C: 0.1<br>See <b>Eq. S4.</b> | 16 | At 4°C: 0.1<br>See <b>Eq. S4.</b>         | 16 |
| Duration of finished product storage at plant/farm pre-shipping <sup>1</sup> (days) ( $U_P$ ) | UNIF(1, 2)                        | 25 | UNIF(0.167,0.5)                           | 30 |
| Temperature of storage at plant/farm pre-shipping <sup>1</sup> (°C) ( $T_P$ )                 | UNIF(3.5, 4.5)                    | 25 | UNIF(2.2,4.4)                             | 30 |
| Duration of transport to retail (days) ( $U_{TR}$ )                                           | UNIF(1, 5, 10)                    | 25 | TRIANG(0.0716, 0.0889, 0.247)             | 30 |
| Temperature of transport to retail (°C) ( $T_{TR}$ )                                          | TRIANG(1.7, 4.4, 10)              | 25 | TRIANG(3.6,6.5,10.9)                      | 30 |
| Duration of storage at retail (days) ( $U_{SR}$ )                                             | TruncN(1.82, 3.3, (0.042, 10.0))  | 25 | UNIF(1,7)                                 | 30 |
| Duration of storage at farmstore (days) ( $U_F$ )                                             | NA                                | NA | UNIF(1,7)                                 | 30 |
| Temperature of storage at retail (°C) ( $T_{SR}$ )                                            | TruncN(2.3, 1.8, (-1.4, 5.4))     | 25 | TRIANG(-6.1787, 4.4444, 14.471,Trunc(0,)) | 30 |
| Temperature of storage at farmstore (°C) ( $T_F$ )                                            | NA                                | NA | TRIANG(-6.1787, 4.4444, 14.471,Trunc(0,)) | 30 |

|                                                                                    |                                                          |    |                                                          |      |
|------------------------------------------------------------------------------------|----------------------------------------------------------|----|----------------------------------------------------------|------|
| Duration of transport to consumer residence (days) ( $U_{TC}$ )                    | TruncN(0.042, 0.02, (0.01, 0.24))                        | 25 | TRIANG(0.012, 0.0271, 0.1731)                            | 30   |
| Temperature of transport to consumer residence ( $^{\circ}\text{C}$ ) ( $T_{TC}$ ) | TruncN(2.3, 1.8, (0, 10))                                | 25 | See <b>Eq. S6</b> .                                      | 30   |
| Home-arrival temperature ( $^{\circ}\text{C}$ ) ( $T_H$ )                          | NA                                                       | NA | TRIANG(-3.3804, 8.8889, 2.156, Trunc(0,))                | 30   |
| Duration of storage at consumer residence (days) ( $U_{SC}$ )                      | UNIF(1, 35)                                              | 25 | PERT(0.5, 2.5, 8.5)                                      | 30   |
| Temperature of storage at consumer residence ( $^{\circ}\text{C}$ ) ( $T_{SC}$ )   | TruncLaplace(4.06, 2.31, (-1, 15))                       | 25 | TRIANG(-5.0221, 2.7778, 17.238)                          | 30   |
| Probability of gallon discard (% , x100) ( $P_{Disc-Gal}$ )                        | 0.12                                                     | 26 | See <b>Eq. S7</b> .                                      | 31   |
| Probability of serving discard (% , x100) ( $P_{Disc-Serv}$ )                      | 0.20                                                     | 26 | See <b>Eq. S7</b> .                                      | 31   |
| Dose-response parameter $r$ ( $r$ )                                                | Baseline:<br>1.0E-08<br>Scenario:<br>1.0E-06,<br>1.0E-10 | 27 | Baseline:<br>1.0E-08<br>Scenario:<br>1.0E-06,<br>1.0E-10 | 27   |
| PCR sensitivity (% , x100) ( $Se$ )                                                | NA                                                       | NA | 0.984                                                    | 8,33 |

|                                                                      |                                        |            |                                        |            |
|----------------------------------------------------------------------|----------------------------------------|------------|----------------------------------------|------------|
| PCR specificity (% , x100) ( <i>Sp</i> )                             | NA                                     | NA         | 0.991                                  | 8,33       |
| PCR limit of detection (logEID <sub>50</sub> /100 ul) ( <i>LoD</i> ) | NA                                     | NA         | 1.5                                    | 34         |
| Pasteurization log reduction (log) ( <i>L</i> )                      | Baseline: 12<br>Scenario: 6, 8, 10, 14 | 17         | NA                                     | NA         |
| Infected cow's milk diversion (% , x100) ( <i>D</i> )                | 0.25                                   | Assumption | Baseline: 0.25<br>Scenario: 0.50, 0.75 | Assumption |

501 <sup>1</sup>The duration/temperature of storage at the processing plant for the pasteurized milk supply chain, or the  
502 duration/temperature of holding at the farm before shipping to retail in the retail purchasing pathway for  
503 the raw supply chain.

504 Note: “log” denotes log<sub>10</sub>



505 **Figure 1: Conceptual model for a quantitative risk assessment of human H5N1 infection**  
506 **from consumption of pasteurized and raw fluid dairy milk.**

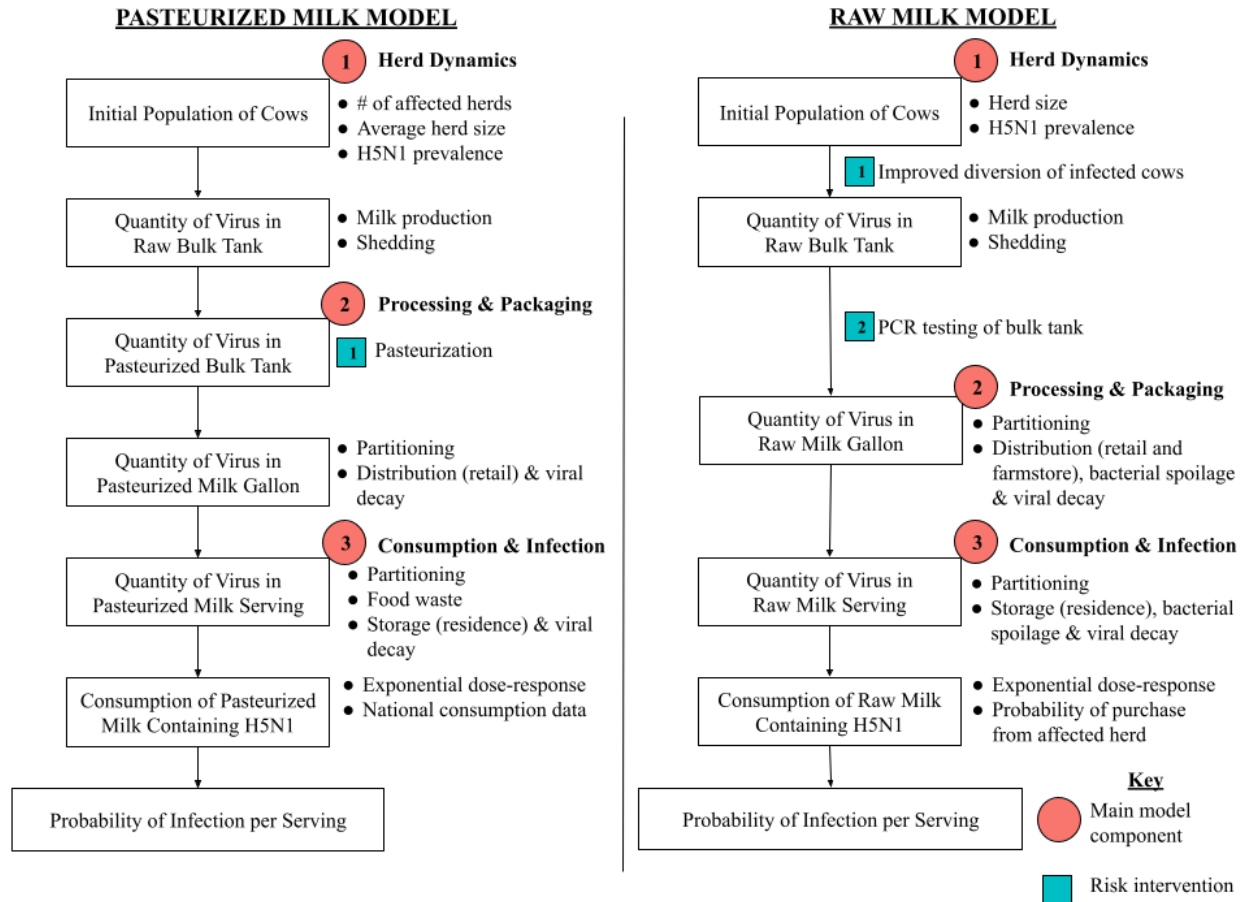

507  
508

509 **Figure 2: Probability density histogram of the predicted concentration ( $\log_{10}\text{TCID}_{50}/\text{mL}$ )**  
510 **of viral material in gallon pasteurized milk containers at retail.** Overlaid are the mean (solid)  
511  $\pm 2\sigma$  (dashed)  $\log_{10}\text{EID}_{50}/\text{mL}$  reported for retail dairy milk in Spackman *et al.*

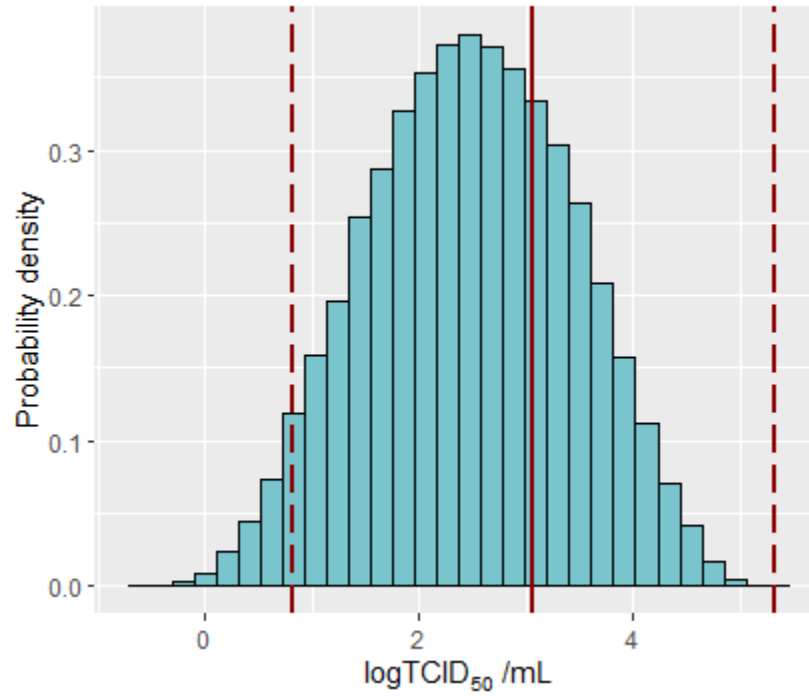

512

513 **Figure 3: Violin plots for the baseline probability of H5N1 infection per serving of**  
514 **pasteurized or raw milk.** Two purchasing pathways (via farmstore and via retail) for raw milk  
515 are differentiated. For the purposes of visualization, a logarithmic (base-10) Y-axis is employed.

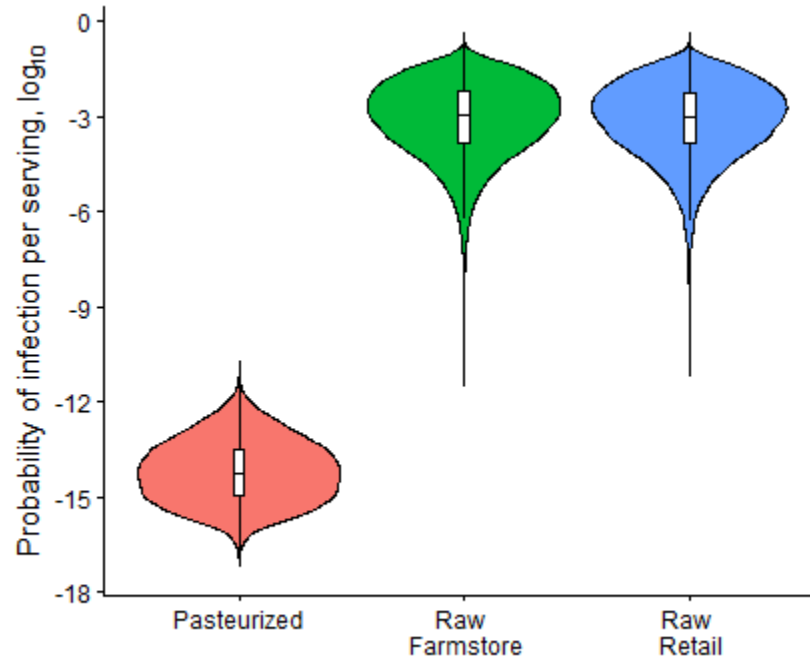

516

517 **Figures 4a-c: Sensitivity of the probability of infection per serving of pasteurized (a) or raw**  
518 **serving obtained through farmstore (b) or retail (c) sale to model parameters achieving**  
519 **statistical (Bonferroni-corrected  $p \leq 0.05$ ) and practical ( $\rho > 0.1$ ) significance.**

520

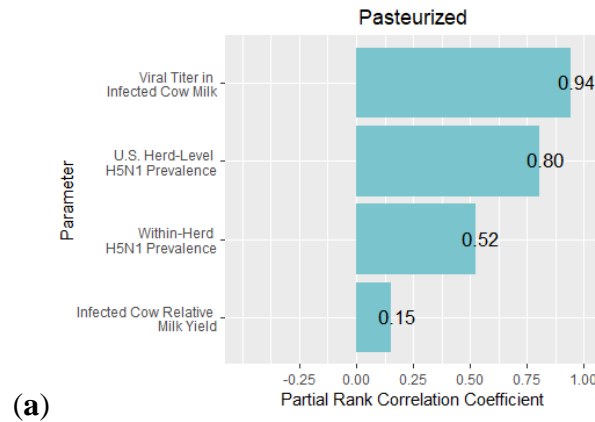

521

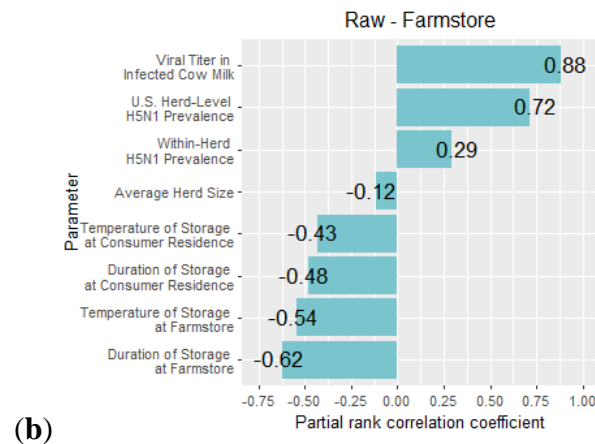

522

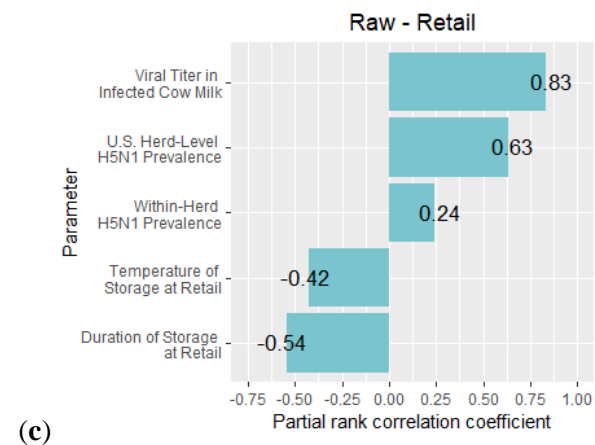

523 **Figure 5: Violin plots for the scenario analysis of varying pasteurization log reductions on**  
524 **the probability of H5N1 infection per pasteurized milk serving.** For the purposes of  
525 visualization, a logarithmic (base-10) Y-axis is employed.

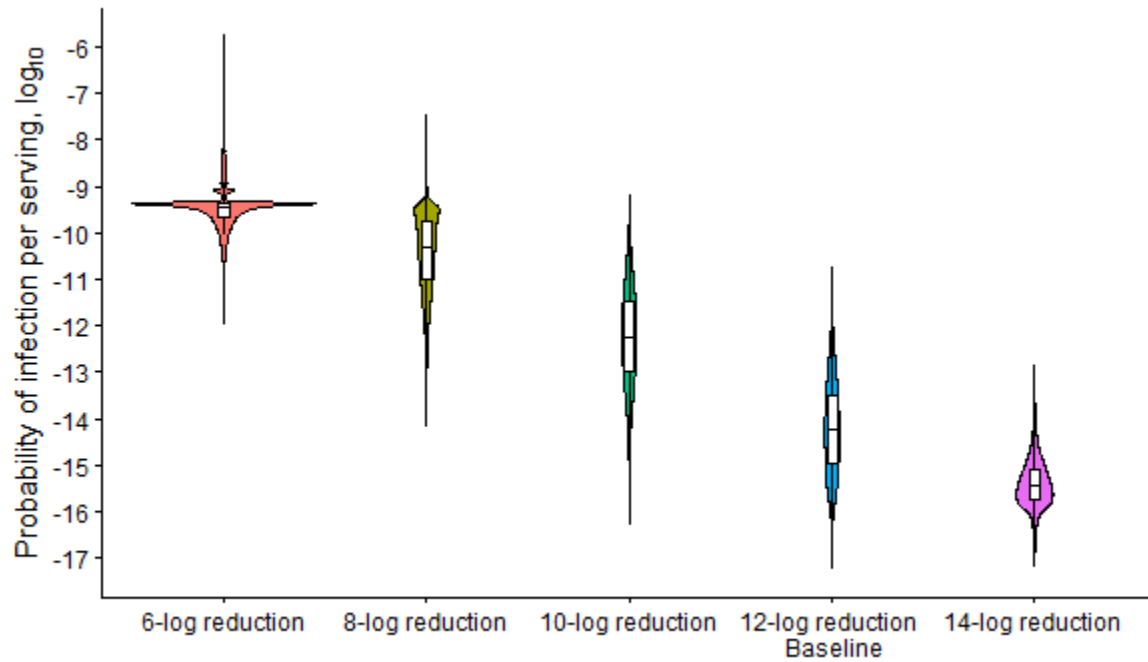

526

527 **Figure 6: Violin plots for the scenario analysis of varying dose-response parameter  $r$  on the**  
528 **probability of infection per pasteurized or raw milk serving.** For the purposes of  
529 visualization, a logarithmic (base-10) Y-axis is employed. The raw milk farmstore purchase  
530 pathway is represented here.

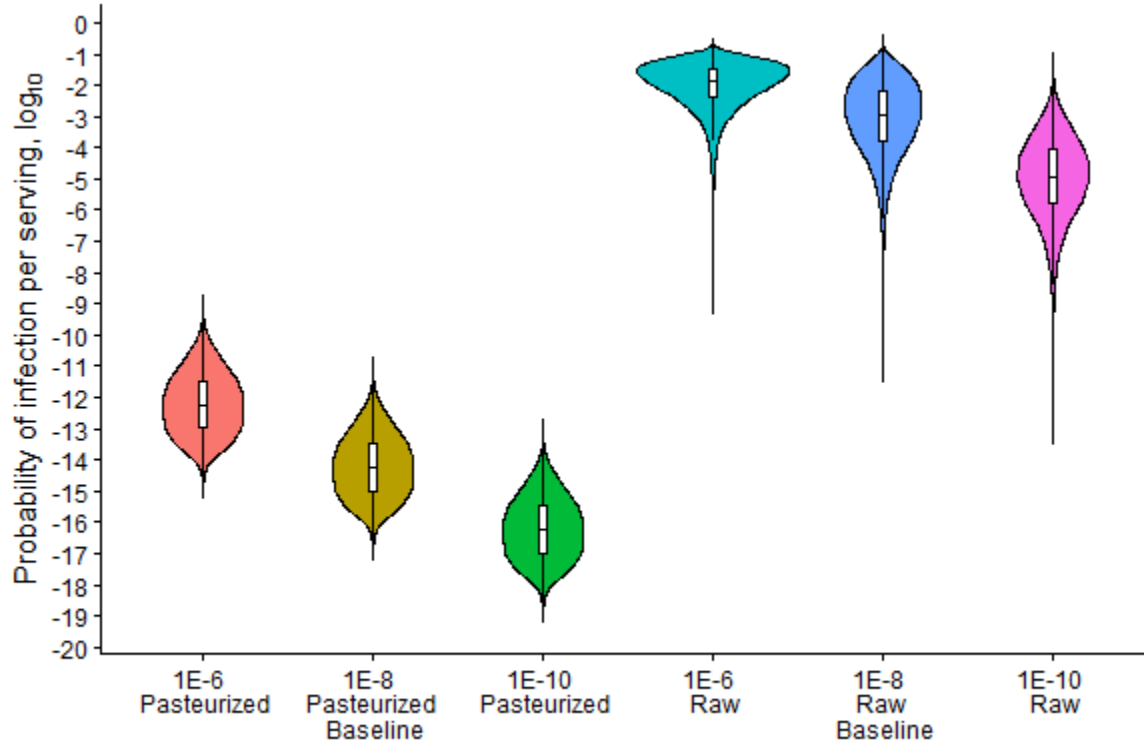

531

532 **Figure 7: Violin plots for the scenario analysis of bulk tank PCR testing and improved**  
533 **infected cow diversion on the probability of infection per raw milk serving.** For the purposes  
534 of visualization, a logarithmic (base-10) Y-axis is employed. The farmstore purchase pathway is  
535 represented here.

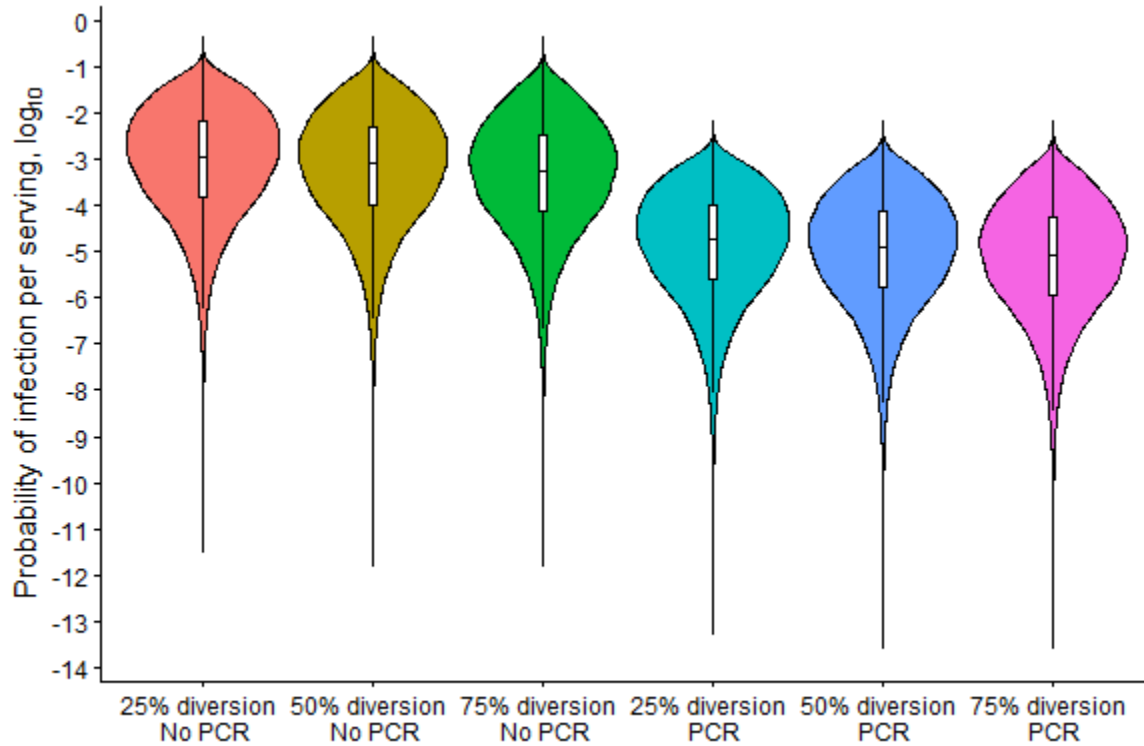

536
